# Supplementary material for: Future developments: your thoughts and our plans
Source: Oxford University Press journal article supplement (doi:10.1242/dev.133355), 2016-01-01
Supplement: dev133355supp.pdf [file dev133355supp.pdf]

## Development 133355 Supplementary Information

### List of reviewers (Nov 2014-Oct 2015)

Kuniya Abe, RIKEN BioResource Center, Japan  
Susan Abmayr, Stowers Inst. for Med. Res., United States  
Aziz Aboobaker, University of Oxford, United Kingdom  
Ehab Abouheif, McGill, United States  
Ralf Adams, Max-Planck-Institute for Molecular Biomedicine, Germany  
Ian Adams, MRC Institute of Genetics and Molecular Medicine, United Kingdom  
Paul Adler, Virginia University, United States  
Stein Aerts, KU Leuven, Belgium  
Markus Affolter, University of Basel, Switzerland  
Dritan Agalliu, University of California, Irvine, United States  
Kiyokazu Agata, Kyoto University, Japan  
Iqbal Ahmad, Univ Nebraska Medical Center, United States  
ROSEMARY AKHURST, UCSF, United States  
Marie-Andree Akimenko, University of Ottawa, Canada  
David Albertini, Kansas University Medical Center, United States  
Paula Alexandre, UCL- Institute of Child Health, United Kingdom  
Douglas Allan, University of British Columbia, Canada  
Benjamin Allen, University of Michigan, United States  
Benjamin Alman, The Hospital for Sick Children, Canada  
Berta Alsina, Universitat Pompeu Fabra, Spain  
Jeffrey Amack, SUNY Upstate Medical University, United States  
Richard Amasino, University of Wisconsin, United States  
Enrique Amaya, University of Manchester, United Kingdom  
Chris Amemiya, Benaroya Research Institute, United States  
Konstantinos Anastassiadis, BIOTEC, Technische Universitaet Dresden, Germany  
Kathryn Anderson, Sloan-Kettering Institute, United States  
Stewart Anderson, University of Pennsylvania School of Medicine, United States  
Deborah Andrew, The Johns Hopkins Univ Sch of Med, United States  
Stephane Angers, U. of Toronto, Canada  
Eva Anton, Univ. of North Carolina, United States  
Christopher Antos, Center for Regenerative Therapies Dresden/TU Dresden, Germany  
Fugaku Aoki, University of Tokyo, Japan  
Junken Aoki, Tohoku University, Japan  
John Aplin, U Manchester, United Kingdom  
Bruce Appel, University of Colorado Denver, United States  
Eli Arama, Weizmann Institute of Science, Israel  
Detlev Arendt, EMBL, Germany  
Saúl Ares, Universidad Carlos III de Madrid, Spain  
Paola Arlotta, Harvard University, United States  
Sebastian Arnold, University Medical Centre Freiburg, Germany  
David Arnosti, Michigan State Univ., United States  
Adam Arterbery, Yale University School of Medicine, United States  
Swathi Arur, MD Anderson, United States  
Ruth Ashery-Padan, Tel Aviv University, Israel  
Peter Askjaer, Andalusian Centre for Developmental Biology, Spain  
Marie-Liesse Asselin-Labat, The Walter and Eliza Hall Institute of Medical Research, Australia  
Alexander Aulehla, EMBL Heidelberg, Germany

Phil Avner, European Molecular Biology Laboratory, Italy  
Raj Awatramani, Northwestern University, United States  
Jeffery Axelrod, Stanford Univ. Sch. of Med., United States  
Erika Bach, New York University School of Medicine, United States  
David Bader, Vanderbilt University, United States  
Michel Bagnat, Duke University, United States  
Richard Baines, University of Manchester, United Kingdom  
Jeroen Bakkers, Hubrecht Institute, Netherlands  
H. Scott Baldwin, Vanderbilt University Medical Center, United States  
Laure Bally-Cuif, CNRS, France  
Amitabha Bandyopadhyay, Indian Institute of Technology Kanpur, United States  
Yves-Alain Barde, Cardiff University, United Kingdom  
Nick Barker, Institute of Medical Biology, Singapore  
Scott Barolo, University of Michigan, United States  
Ben Barres, Stanford University School of Medicine, United States  
Marisa Bartolomei, Univ of Pennsylvania Sch of Med, United States  
Michelle Barton, MD Anderson Cancer center, United States  
Greg Bashaw, University of Pennsylvania, United States  
L S Baskin, UCSF Children's Hospital, United States  
Konrad Basler, University of Zurich, Switzerland  
M Basson, King's College London, United Kingdom  
Martin Bastmeyer, Karlsruhe Institute of Technology (KIT), Germany  
Michele Battle, Medical College of Wisconsin, United States  
Marie-Laure Baudet, University of Trento, Italy  
Ryan Baugh, Duke, United States  
Buzz Baum, MRC Laboratory for Molecular Cell Biology &, United Kingdom  
Victoria Bautch, The University of North Carolina, United States  
Mary Baylies, Memorial Sloan-Kettering Cancer Center, United States  
Christine Beattie, Ohio State University, United States  
Caroline Beck, University of Otago, New Zealand  
Thomas Becker, University of Edinburgh, United Kingdom  
Tom Beeckman, University Gent, Belgium  
Gerrit Begemann, University of Bayreuth, Germany  
Richard Behringer, MD Anderson Cancer Center, United States  
Dimitris Beis, Foundation Academy of Athens, Greece  
Greg Beitel, Northwestern University, United States  
Amy Bejsovec, Duke University, United States  
Patricia Beldade, Instituto Gulbenkian de Ciência, Portugal  
Yohanns Bellaiche, Institut CURIE, France  
Catherine Bellini, Umea Plant Science Centre, Sweden  
Saverio Bellusci, Justus-Liebig-University Giessen, Germany  
Alexa Bely, University of Maryland, United States  
Joshua Bembek, University of Tennessee, Knoxville, United States  
Tom Bennett, University of Cambridge, United Kingdom  
Celeste Berg, University of Washington, United States  
Dominique Bergmann, Stanford University, United States  
Andreas Bergmann, University of Massachusetts Medical School, United States  
Olivia Bermingham-McDonogh, University of Washington, United States  
Benedikt Berninger, Johannes Gutenberg University Mainz, Germany  
John Bertram, Monash University, Australia  
Juan Betancur, RIKEN, Japan  
Christer Betsholtz, University of Uppsala, Sweden

Rishi Bhalerao, Umeå Plant Science Centre, Sweden  
Isaac Bianco, University College London, United Kingdom  
Anna Bigas, IMIM-Hospital del Mar, Spain  
David Bilder, University of California-Berkeley, United States  
Carmen Birchmeier, Max-Delbrück-Centrum für Molekulare Medizin, Germany  
Brian Black, University of California, San Francisco, United States  
Ben Black, U Penn. Biochem. Dept, United States  
Seth Blackshaw, Johns Hopkins University School of Medicine, United States  
Cedric Blanpain, Université Libre de Bruxelles (ULB), Belgium  
Francesco Blasi, IFOM, Italy  
Martin Blum, Universität Hohenheim, Germany  
Rolf Bodmer, Sanford-Burnham Medical Res. Inst., United States  
Brigitte Boizet-Bonhoure, CNRS Institut de Génétique Humaine, France  
Jurgen Bolz, Universität Jena, Germany  
Roberto Bonasio, Univ. of Pennsylvania, United States  
Thorsten Boroviak, University of Cambridge, United Kingdom  
Victor Borrell, CSIC - Universidad Miguel Hernández, Spain  
Anne-Gaëlle Borycki, University of Sheffield, United Kingdom  
Vladimir Botchkarev, University of Bradford, United Kingdom  
Maxime Bouchard, McGill University, Canada  
Kim Boutilier, Plant Research International, Netherlands  
Paola Bovolenta, Centro de Biología Molecular Severo Ochoa. CSIC-UAM., Spain  
Bruce Bowerman, University of Oregon, United States  
Lynn Boyd, Middle Tennessee State University, United States  
Laurie Boyer, Massachusetts Institute of Technology, United States  
Andrew Brack, Eli and Edythe Broad Center of Regeneration Medicine and Stem Cell Research, United States  
Adrian Bracken, Trinity College Dublin, Ireland  
Frank Bradke, German Center for Neurodegenerative Diseases, Germany  
Michael Brand, TU Dresden, Germany  
Thomas Brand, Imperial College London, United Kingdom  
Beate Brand-Saberi, Ruhr-Universität Bochum, Germany  
Robert Braun, The Jackson Laboratory, United States  
Sarah Bray, University of Cambridge, United Kingdom  
Hans Brenner, University of Basel, Switzerland  
James Briscoe, The Francis Crick Institute, United Kingdom  
Ali Brivanlou, The Rockefeller University, United States  
Kendal Broadie, Vanderbilt University, United States  
Vania Broccoli, San Raffaele Scient. Instit., Italy  
Neil Brockdorff, MRC Clinical Sciences Centre, United Kingdom  
Marianne Bronner, California Institute of Technology, Pasadena, United States  
Peter Brophy, Edinburgh University, United Kingdom  
Susan Brown, Kansas State University, United States  
Ashley Bruce, University of Toronto, Canada  
Samantha Brugmann, Cincinnati Children's Hospital Medical Center, United States  
Benoit Bruneau, Gladstone Institute of Cardiovascular Disease, United States  
Jean-Francois Brunet, CNRS, France  
Oliver Brüstle, University of Bonn, Germany  
Susan Bryant, University of California Irvine, United States  
Scott Bultman, University of North Carolina at Chapel Hill, United States  
Steve Burden, Skirball Institute, United States  
Tom Burdon, Roslin Institute, United Kingdom

Shawn Burgess, NHGRI/NIH, United States  
David Burgess, Boston College, United States  
Ann Burke, Wesleyan University, United States  
Robert D Burke, University of Victoria, Canada  
Alan Burns, UCL Institute of Child Health, United Kingdom  
Caroline Burns, Massachusetts General Hospital, United States  
Wolfgang Busch, Gregor Mendel Institute, Austria  
Jeffrey Bush, UCSF, United States  
Michael Buszczak, UT Southwestern, United States  
Laura Buttitta, University of Michigan, United States  
Mary Byrne, University of Sydney, Australia  
Ken Cadigan, Univ. of Michigan, United States  
Chenleng Cai, Mount Sinai School of Medicine, United States  
Bradley Cairns, Univ. Utah, United States  
Federico Calegari, CRTD, Germany  
Anne Calof, University of California, Irvine, United States  
David Cano, Institute of Biomedicine of Seville, Spain  
Xinwei Cao, St Jude Children's Research Hospital, United States  
Blanche Capel, Duke University Medical Center, United States  
Silvia Cappello, Max Planck Institute of Psychiatry, Germany  
Wellington Cardoso, Columbia University Medical Center, United States  
Matthias Carl, University Heidelberg, Medical Faculty Mannheim, Germany  
Francine Carland, Yale University, United States  
Peter Carlsson, Goteborg University, Sweden  
Leif Carlsson, Umea University, Sweden  
Tom Carney, IMCB, Singapore  
John Carroll, Monash University, Australia  
Richard Carthew, Northwestern University, United States  
Jaime Carvajal, CABD-CSIC, Spain  
Fernando Casares, CABD, CSIC-Univ. Pablo de Olavide, Spain  
Stuart Casson, University of Sheffield, United Kingdom  
Valérie Castellani, University of Lyon, University of Lyon1, France  
Elena Cattaneo, Università di Milano, Italy  
Florencia Cavodeassi, Centro de Biología Molecular Severo Ochoa, Spain  
Michel Cayouette, Institut rech cliniqu Montreal, Canada  
Connie Cepko, Harvard Medical School, United States  
Kara Cervený, Reed College, United States  
Yang Chai, University of Southern California, United States  
Anand Chandrasekhar, University of Missouri, United States  
Gavin Chapman, Victor Chang Cardiac Research Institute, Australia  
Cyril Charles, ENS Lyon, France  
Guillaume Charras, UCLA, United Kingdom  
Frederic Charron, Institut de recherches cliniques de Montreal, Canada  
Claire Chazaud, GReD- INSERM/CNRS/Clermont Université, France  
Frederic Chedin, University of California, Davis, United States  
Alain Chedotal, Institut de la Vision, France  
Elizabeth Chen, Johns Hopkins University School of Medicine, United States  
Jiong Chen, Nanjing University, China  
Feng Chen, Washington University, United States  
Rujin Chen, Samuel Roberts Noble Foundation, United States  
YiPing Chen, Tulane University, United States  
Xin Chen, Johns Hopkins University, United States

Neil Chi, UCSD, United States  
Chin Chiang, Vanderbilt University, United States  
Kazuyoshi Chiba, Ochanomizu University, Japan  
Sarah Childs, University of Calgary, Canada  
Andrew Chisholm, University of California San Diego, United States  
Ajay Chitnis, NIH, United States  
Kyunghee Choi, Washington University, United States  
Lionel Christiaen, NYU, United States  
Vincent Christoffels, University of Amsterdam, Netherlands  
Pao-Tien Chuang, University of California San Francisco, United States  
Susana Chuva de Sousa Lopes, Leiden University Medical Center, Netherlands  
Scott Clark, University of Nevada, Reno, United States  
Jonathan Clarke, MRC Centre for Developmental Neurobiology, United Kingdom  
Hugh Clarke, McGill University, Canada  
Ondine Cleaver, UT Southwestern Medical Center, United States  
Wilson Clements, St Jude Children's Research Hospital, United States  
David Clouthier, University of Colorado Denver, United States  
Stephen Cohen, University of Copenhagen, Denmark  
Ethan David Cohen, University of Rochester School of Medicine and Dentistry, United States  
Martin Cohn, HHMI & University of Florida, United States  
Lucia Colombo, University of Milan, Italy  
Irina Conboy, University of California, United States  
Miguel Concha, Universidad de Chile, Chile  
Frank Conlon, University of North Carolina, United States  
Barbara Conradt, LMU Munich, Germany  
G. Giacomo Consalez, San Raffaele Scientific Institute, Italy  
Daniel Constam, Ecole Polytechnique Federale de Lausanne, Switzerland  
Ivan Conte, Telethon Institute of Genetics and Medicine, Italy  
Marco Conti, Center for Reproductive Sciences, United States  
Tiffany Cook, Wayne State University School of Medicine, United States  
Kimberly Cooper, University of California San Diego, United States  
Andrew J. Copp, Institute of Child Health, UCL, United Kingdom  
Giulio Cossu, University of Manchester, United Kingdom  
Frank Costantini, Columbia University, United States  
George Coupland, MPI, Germany  
Luis Covarrubias, Univ. Nacional Autónoma de México, Mexico  
Chad Cowan, Harvard University, United States  
April Craft, Boston Children's Hospital, United States  
Harold Cremer, IBDM, France  
Stephen Crews, Univ of North Carolina, United States  
Colin Crist, McGill University, Canada  
Jenifer Croce, CNRS, France  
Gage Crump, University of Southern California Keck School of Medicine, United States  
Ana Cumano, Unité Lymphopoiesis, France  
Vincent Cunliffe, University of Sheffield, United Kingdom  
Peter Currie, Australian Regenerative Medicine Institute, Australia  
Andras Czirok, University of Kansas Medical Center, United States  
Nadia Dahmane, University of Pennsylvania, United States  
Christian Dahmann, Technische Universität Dresden, Germany  
Kim Dale, University of Dundee, United Kingdom  
Christian Dani, UMR6543 CNRS, France  
Nicolas Daudet, University College London, United Kingdom

Randy Daughters, University of Minnesota, United States  
Lance Davidson, University of Pittsburgh, United States  
Irwin Davidson, IGBMC, France  
Beverly Davidson, The Children's Hospital of Philadelphia, United States  
Benjamin Davies, University of Oxford, United Kingdom  
Brian Davis, The University of Texas, United States  
Alice Davy, CNRS, France  
Alexandre Dayer, University of Geneva, Switzerland  
Benoit de Crombrughe, UT M. D. Anderson Cancer Center, United States  
Gerald de Haan, University Medical Center, Netherlands  
Rabindranath De La Fuente, Univ. of Georgia, College of Veterinary Med., United States  
Jose Luis de la Pompa, Centro Nacional de Investigaciones Cardiovasculares (CNIC), Spain  
Wouter de Laat, Hubrecht Institute, Netherlands  
Stijn De Langhe, National Jewish Health, United States  
Stefano De Renzis, EMBL-Heidelberg, Germany  
Dirk de Rooij, Utrecht University, Netherlands  
Ive De Smet, VIB, Belgium  
Lieven de Veylder, Ghent University, Belgium  
Jurrien Dean, National Institutes of Health, United States  
Wendy Dean, The Babraham Institute, United Kingdom  
Peter Dearden, University of Otago, New Zealand  
Jesus del Mazo, Centro de Investigaciones Biológicas, Spain  
Paul Delgado Olguin, The Hospital for Sick Children, Canada  
Benjamin Deneen, Baylor College of Medicine, United States  
Wu-Min Deng, Florida State University, United States  
Jacqueline Deschamps, The Netherlands Institute for Developmental Biology, Netherlands  
Claude Desplan, New York University, United States  
Danelle Devenport, Princeton University, United States  
Francisco Diaz, The Pennsylvania State University, United States  
Mary Dickinson, Baylor College of Medicine, United States  
Susanne Dietrich, Portsmouth University, United Kingdom  
Leda Dimou, LMU, Germany  
Sheng Ding, Gladstone Institutes, United States  
Philippe Djian, CNRS/Université Paris Descartes, France  
Chris Doe, University of Oregon/HHMI, United States  
Liam Dolan, University of Oxford, United Kingdom  
Maria Dominguez, CSIC (Spanish Research Council), Spain  
Juan Dong, Rutgers, United States  
Mary Donohoe, Burke Medical Research Institute/Weill Cornell Medical College, United States  
Yuval Dor, Hebrew University, Israel  
Richard Dorsky, University of Utah, United States  
Nathalie Dostatni, Institut Curie, France  
Carlos Dotti, University of Leuven, Belgium  
Scott Dougan, The University of Georgia, United States  
Bruce Draper, University of California, Davis, United States  
Gregory Dressler, University of Michigan, United States  
Iain Drummond, Massachusetts General Hospital and Harvard Medical School, United States  
Daniela Drummond-Barbosa, Johns Hopkins University, United States  
Joseph Dubrovsky, Instituto de Biotecnología, UNAM, Mexico  
Carsten Duch, JGU Mainz, Germany  
Patricia Ducey, Columbia University Medical Center, United States  
Andrew Dudley, University of Nebraska Medical Center, United States

Gregg Duester, Sanford-Burnham Medical Research Institute, United States  
Stephen Duncan, Med. Coll. of Wisconsin, United States  
Francesca Duncan, The University of Kansas Medical Center, United States  
Ray Dunn, Institute of Medical Biology, Singapore  
Valerie Dupe, UMR6061, France  
Delphine Duprez, CNRS, France  
Robert Duronio, University of North Carolina, United States  
Sebastian Dworkin, Monash University, Australia  
Elaine Dzierzak, Erasmus University, Netherlands  
Suzanne Eaton, Max Planck Institute, Germany  
Connie Eaves, BC Cancer Agency Research Centre, Canada  
Christian Eckmann, MPI of Molecular Cell Biology and Genetics, Germany  
Bruce Edgar, German Cancer Research Center (DKFZ)-, Germany  
Elisabeth Ehler, King's College London, United Kingdom  
David Ehrhardt, Carnegie Institution for Science, United States  
Anne Eichmann, Yale University School of Medicine, United States  
Britta Eickholt, Charité - Universitätsmedizin Berlin, Germany  
Mototsugu Eiraku, RIKEN Center for Developmental Biology, Japan  
Judith Eisen, University of Oregon, United States  
Leonard Eisenberg, New York Medical College, United States  
David Eisenmann, Univ. of Maryland Baltimore County, United States  
Marc Ekker, University of Ottawa, Canada  
Andrew Elefanty, Monash University, Australia  
Salah Elias, Oxford University, United Kingdom  
Wolfgang Enard, Ludwig-Maximilians University Munich, Germany  
Takaho Endo, RIKEN, Japan  
Felix Engel, Friedrich-Alexander-Universität Erlangen-Nürnberg, Germany  
Vasso Episkopou, Imperial College London, United Kingdom  
Douglas Epstein, Univ. of Pennsylvania, United States  
Sylvia Erhardt, University of Heidelberg, Germany  
Yuval Eshed, Weizmann Institute of Science, Israel  
Jeffrey Essner, Iowa State University, United States  
Charles Ettensohn, Carnegie Mellon University, United States  
Sylvia Evans, University of California San Diego, United States  
Todd Evans, Weill Cornell Medical College, United States  
Andrew Ewald, Johns Hopkins School of Medicine, United States  
Elena Ezhkova, Mount Sinai Hospital, United States  
James Fadool, Biological Science, United States  
Francois Fagotto, McGill University, Canada  
Chen-Ming Fan, Carnegie Institution of Washington, United States  
Christian Fankhauser, University of Lausanne, Switzerland  
Emmanuel FARGE, Institut Curie, France  
Peter Farlie, Royal Childrens Hospital, Australia  
Geoffrey Faulkner, University of Queensland, Australia  
James Fawcett, Cambridge University Centre for Brain Repair, United Kingdom  
Jose Feijo, Univ Lisboa, Fac Ciências, Portugal  
Robert Feil, University of Montpellier, CNRS, France  
Donna Fekete, Purdue University, United States  
Jessica Feldman, Stanford University, United States  
Edwin Ferguson, Univ of Chicago, United States  
Charles French-Constant, University of Edinburgh, United Kingdom

Anthony Firulli, Riley Heart Research Center Wells Center for Pediatric Research Indiana University School of Medicine, United States  
Andy Fischer, The Ohio State University, United States  
Andreas Fischer, German Cancer Research Center (DKFZ), Germany  
Urs Fischer, Umeå Plant Science Centre, Sweden  
Jason Fish, University of Toronto, Canada  
Gord Fishell, Smilow Neuroscience Program, United States  
Susan Fisher, University of California, San Francisco, United States  
Amanda Fisher, Imperial College, United Kingdom  
Rafael Fissore, University of Massachusetts, United States  
Angeleen Fleming, University of Cambridge, United Kingdom  
Andrew Fleming, University of Sheffield, United Kingdom  
Jennifer Fletcher, USDA/UC Berkeley, United States  
Kathy Foltz, UCSB, United States  
Douglas Forrest, NIH, United States  
Valentina Fossati, The New York Stem Cell Foundation Research Institute, United States  
Donald Fox, Duke University, United States  
Philippa Francis-West, King's College London, United Kingdom  
Paul Francois, McGill University, Canada  
Dale Frank, Technion - Israel Institute of Technology, Israel  
C. Andrew Frank, University of Iowa, United States  
Manfred Frasch, University of Erlangen Nuremberg, Germany  
Marc Freeman, UMass Medical School, United States  
Jean-Noel Freund, INSERM, France  
Markus Friedrich, Wayne State University, United States  
Bernd Fritzsche, University of Iowa, United States  
Maxim Frolov, University of Illinois at Chicago, United States  
Florian Frugier, CNRS, France  
Sabine Fuhrmann, University of Utah, United States  
Hidehiro Fukaki, Kobe University, Japan  
Margaret Fuller, Stanford University School of Medicine, United States  
Andrew Furley, University of Sheffield, United Kingdom  
Masahiko Furutani, Nara Institute of Science and Technology, Japan  
Paul Gadue, Children's Hospital of Philadelphia, United States  
Fred Gage, Salk Institute, United States  
Kimberly Gallagher, University of Pennsylvania, United States  
Brigitte Galliot, University of Geneva, Switzerland  
Vittorio Gallo, Children's National Medical Center, United States  
Laura Gammill, University of Minnesota, United States  
Maureen Gannon, Vanderbilt University Medical Center, United States  
Nan Gao, Rutgers University, United States  
Hernan Garcia, University of California Berkeley, United States  
Martín García-Castro, University of California, Riverside, United States  
David Gardner, University of Melbourne, Australia  
Sonia Garel, INSERM, France  
Gian Garriga, University of California, United States  
Charles Gasser, University of California, Davis, United States  
Ulrike Gaul, University of Munich, Germany  
Elizabeth Gavis, Princeton University, United States  
Niko Geldner, University of Lausanne, Switzerland  
Vladimir Gelfand, Northwestern University Feinberg School of Medicine, United States  
Holger Gerhardt, London Research Institute - Cancer Research UK, United Kingdom



John Gerhart, University of California, United States  
Stéphane GERMAIN, INSERM Unit 1050, France  
M. Gershon, Columbia University, United States  
Christopher Geyer, East Carolina University, United States  
Amin Ghabrial, University of Pennsylvania, United States  
Angela Giangrande, IGBMC, France  
Adam Giangreco, UCL, United Kingdom  
Maria Grazia Giansanti, Consiglio Nazionale delle Ricerche, Italy  
Miriam Gifford, University of Warwick, United Kingdom  
Yoav Gilad, University of Chicago, United States  
Penny Gilbert, University of Toronto, Canada  
Lilach Gilboa, Weizmann Institute of Science, Israel  
Mike Gilchrist, NIMR, United Kingdom  
Darren Gilmour, EMBL Heidelberg, Germany  
Antonio Giraldez, Yale University, United States  
Fernando Giraldez, UNIVERSITAT POMPEU FABRA, Spain  
Joseph Gleeson, HHMI, Rockefeller U, United States  
Michael Glotzer, The University of Chicago, United States  
Marina Glukhova, UMR 144 CNRS-Institut Curie, France  
Dorothea Godt, University of Toronto, Canada  
James Godwin, Monash University, Australia  
Magdalena Goetz, Stem Cell Institute, Germany  
Andre Goffinet, Univ Louvain, Belgium  
Jeffrey Golden, Brigham and Women's Hospital, United States  
Daniel Goldman, University of Michigan, United States  
Steven Goldman, University of Rochester, United States  
Bob Goldstein, University of North Carolina at Chapel Hill, United States  
Brigitte Gomperts, Broad Center UCLA, United Kingdom  
Xiaohua Gong, University California Berkeley, United States  
Cayetano Gonzalez, IRB barcelona, Spain  
Marcos Gonzalez-Gaitan, University of Geneva, Switzerland  
Sofie Goormachtig, University of Gent, Belgium  
Alon Goren, Broad Institute, United States  
Nicole Gorfinkiel, Centro de Biología Molecular "Severo Ochoa", Spain  
Berthold Gottgens, University of Cambridge, United Kingdom  
Yacine Graba, CNRS-University of Marseille, France  
Gerard Gradwohl, IGBMC, France  
Anthony Graham, MRC, United Kingdom  
Muriel Grammont, Université Claude Bernard, France  
Michael Granato, University of Pennsylvania, United States  
Heiner Grandel, University of Dresden, Germany  
James Granneman, Wayne State University, United States  
Anne Grapin-Botton, DanStem, University of Copenhagen, Denmark  
Mariona Graupera, IDIBELL, Spain  
Julie Gray, University of Sheffield, United Kingdom  
Paul Gray, Washington University, United States  
Thomas Greb, Centre for Organismal Studies, Germany  
Jeremy Green, King's College London, United Kingdom  
Andy Greenfield, MRC Harwell, United Kingdom  
David Greenstein, University of Minnesota, United States  
Iva Greenwald, Columbia University, United States  
Thomas Gridley, Maine Medical Center Research Institute, United States

Michael Griswold, Washington State University, United States  
Jerome Gros, Institut Pasteur, France  
Jeffrey Gross, University of Texas at Austin, United States  
Rita Gross-Hardt, University of Bremen, Germany  
Andrew Groves, Baylor College of Medicine, United States  
David Grunwald, University of Utah, United States  
Karine Guevorkian, IGBMC, France  
Antoine Guichet, CNRS - Institut Jacques Monod, France  
Francois Guillemot, The Crick Institute - Mill Hill Laboratory, United Kingdom  
Rana Gupta, The University of Texas Southwestern Medical Center, United States  
Sarah Guthrie, King's College London, United Kingdom  
Anna-Katerina Hadjantonakis, Sloan-Kettering Institute, United States  
Petra Hajkova, Imperial College London, United Kingdom  
Guillaume Halet, CNRS UMR 6061, France  
Marc Halfon, SUNY at Buffalo, United States  
Karen Halliday, Institute of Molecular Plant Sciences, United Kingdom  
Mary Halloran, University of Wisconsin, United States  
Marnie Halpern, Carnegie Institution for Science, United States  
Amro Hamdoun, UCSD, United States  
Marc Hammarlund, Yale, United States  
Matthias Hammerschmidt, Developmental Biology, Germany  
F. Kent Hamra, UT-Southwestern Medical Center, United States  
Young-Goo Han, St. Jude Children's Research Hospital, United States  
Jing-Dong Han, Shanghai Institutes for Biological Sciences, United States  
Mary Ann Handel, The Jackson Laboratory, United States  
Robert Handin, Brigham and Women's Hospital, United Kingdom  
Dave Hansen, University of Calgary, Canada  
Jeff Hardin, University of Wisconsin, United States  
Christian Hardtke, University of Lausanne, Switzerland  
Iswar Hariharan, University of California, United States  
Richard Harland, University of California-Berkeley, United States  
William Harris, Cambridge Univ., United Kingdom  
Tony Harris, University of Toronto, Canada  
Daniel Hart, UCSF, United States  
Volker Hartenstein, UCLA, United States  
Christine Hartmann, Institut for Experimental Musculoskeletal Medicine (IEMM), Germany  
Richard Harvey, Victor Chang Cardiac Research Institute, Australia  
Mitsuhiro Hashimoto, Nagoya Univ., Japan  
Bassem Hassan, VIB and KU Leuven School of Medicine, Belgium  
David Hassel, University Hospital Heidelberg, Germany  
Mary Hatten, Rockefeller University, United States  
David Hay, MRC Centre for Regenerative Medicine, United Kingdom  
Angela Hay, Max Planck Institute for Plant Breeding Research, Germany  
Shigeo Hayashi, Riken Center for Developmental Biology, Japan  
Katsuhiko Hayashi, Kyushu University, Japan  
Tiffany Heanue, Francis Crick Institute, United Kingdom  
Edith Heard, Institut Curie, France  
Jean Hebert, Albert Einstein College of Medicine, United States  
Jerry Hedrick, UC, Davis, United States  
Carl-Philipp Heisenberg, Institute of Science and Technology Austria, Austria  
Yka Helariutta, University of Helsinki, Finland  
Deborah Henderson, Newcastle University, United Kingdom

Brian Hendrich, University of Cambridge, United Kingdom  
Domingos Henrique, Instituto de Medicina Molecular, Portugal  
Jonathan Q. Henry, University of Illinois, United States  
Clarissa Henry, University of Maine, United States  
Brian Herring, Indiana University School of Medicine, United States  
Doris Herzlinger, weill medical college, United States  
Rex Hess, University of Illinois, United States  
Robert Hevner, University of Washington, United States  
Masahiko Hibi, Nagoya University, Japan  
Peter Hiesinger, Southwestern Medical Center, United States  
Tetsuya Higashiyama, Nagoya University, Japan  
Takashi Hiiragi, EMBL, Germany  
Robert Hill, University of Edinburgh, United Kingdom  
Gary Hime, University of Melbourne, Australia  
Lindsay Hinck, University of California, Santa Cruz, United States  
Robert Hindges, King's College London, United Kingdom  
Veronica Hinman, Carnegie Mellon University, United States  
Simon Hippenmeyer, Institute of Science and Technology, Austria  
Tomonori Hirose, Yokohama City University Graduate School of Medical Science, Japan  
Timothy Hla, Cornell University, United States  
Lawrence Hobbie, Adelphi University, United States  
Michael Hoch, University of Bonn, Germany  
Konrad Hochedlinger, Harvard University, United States  
Ute Hoecker, University of Cologne, Germany  
Brigid Hogan, Duke University Medical Center, United States  
Ben Hogan, University of Queensland, Australia  
Andrew Holland, Johns Hopkins University School of Medicine, United States  
Scott Holley, Yale University, United States  
Robert Holmgren, Northwestern Univ., United States  
Thomas Holstein, Heidelberg University, Germany  
Christine Holt, University of Cambridge, United Kingdom  
Yang Hong, University of Pittsburgh Medical School, United States  
Casper Hoogenraad, Utrecht University, Netherlands  
Stefan Hoppler, University of Aberdeen, United Kingdom  
Sally Horne-Badovinac, University of Chicago, United States  
Valerie Horsley, Yale University, United States  
Corinne Houart, MRC, United Kingdom  
Douglas Houston, The University of Iowa, United States  
Beatrice Howard, The Institute of Cancer Research, United Kingdom  
Otso HŠŠrŠ, Univ. of Helsinki, Finland  
Aaron Hsueh, Stanford University, United States  
Patrick Hu, University of Michigan Medical School, United States  
Xun Huang, Institute of Genetics & Developmental Biology, China  
Zhen Huang, University of Wisconsin - Madison, United States  
Yingqun Huang, Yale School of Medicine, United States  
Danwei Huangfu, Memorial Sloan-Kettering Cancer Center, United States  
E. Jane Hubbard, Skirball Institute, United States  
Tobias Huber, Freiburg University, Germany  
Andrew Huberman, University of California, San Diego, United States  
Chi-Chung Hui, The Hospital for Sick Children, Canada  
Juan Hurle, Universidad de Cantabria, Spain  
Wieland Huttner, Max Planck Institute, Germany

Jean-Rene Huynh, Institut Curie, France  
Dagmar Iber, ETH Zürich, Switzerland  
Vahan Indjeian, MRC Clinical Sciences Centre, Imperial College London, United Kingdom  
Philip Ingham, Imperial College, London - Nanyang Technological University, Singapore  
Holly Ingraham, University of California, San Francisco, United States  
Robert Insall, The Beatson Institute for Cancer Research, United Kingdom  
Tony Ip, Univ of Massachusetts Med Cntr, United States  
Kenneth Irvine, Rutgers / HHMI, United States  
Sachiko Iseki, Tokyo Medical and Dental University, Japan  
Fumitoshi Ishino, Medical Research Institute, Tokyo Medical and Dental University, Japan  
Toshiro Ito, Temasek Life Sciences Laboratory, Singapore  
Juan Carlos Izpisua Belmonte, Salk Institute, United States  
Antonio Jacinto, Universidade Nova de Lisboa, Portugal  
David Jackson, Cold Spring Harbor Laboratory, United States  
Johannes Jaeger, Centre for Genomic Regulation (CRG), Spain  
Thierry JAFFREDO, CNRS, France  
Krzysztof Jagla, INSERM, France  
Jens Januschke, University of Dundee - School of Life Sciences, United Kingdom  
Heinrich Jasper, Buck, United States  
Gaspar Jekely, MPI Tuebingen, United Kingdom  
Kim Jensen, University of Copenhagen, Denmark  
Jukka Jernvall, Institute of Biotechnology, Finland  
Jukka Jernvall, University of Helsinki, Finland  
Kristjan Jessen, University College London, United Kingdom  
James Jester, University of California, Irvine, United States  
Jianhang Jia, University of Kentucky, United States  
Jin Jiang, UT Southwestern Medical Center, United States  
Rulang Jiang, Cincinnati Children's Hospital Medical Center, United States  
Peihua Jiang, Monell Chemical Senses Center, United States  
Yishi Jin, University of California, San Diego, United States  
Suk-Won Jin, Yale University School of Medicine, United States  
Naihe Jing, Chinese Academy of Sciences, China  
Jane Johnson, Univ.Texas, United States  
Laura Johnston, Columbia University, United States  
Philip Jordan, Johns Hopkins University, United States  
Erik Jorgensen, University of Utah, United States  
Alexandra Joyner, Sloan-Kettering Institute, United States  
Gabor Juhasz, Eotvos Lorand University, Hungary  
Vesa Kaartinen, University of Michigan, United States  
Klaus Kaestner, University of Pennsylvania, United States  
Ryoichiro Kageyama, Kyoto University, Japan  
Sundeep Kalantry, University of Michigan Medical School, United States  
Vladimir Kalinichenko, Cincinnati Children's Hospital Medical Center, United States  
Yoshiakira Kanai, The University of Tokyo, Japan  
Tomoko Kaneko-Ishino, Tokai University, Japan  
Artur Kania, Institut de recherches cliniques de Montreal / IRCM, Canada  
Gabrielle Kardon, University of Utah, United States  
Jan Kaslin, Australian Regenerative Medicine Institute, Australia  
Brian Kaspar, The Ohio State University School of Medicine, United States  
Judith Kassis, NICHD, NIH, United States  
Hideya Kawaji, RIKEN, Japan  
Yasuhiko Kawakami, University of Minnesota, United States

Takeshi Kawauchi, Keio University School of Medicine, Japan  
Rob Kay, MRC, United Kingdom  
Graham Kay, Royal Brisbane Hospital, Australia  
Gordon Keller, MaRS Centre, Canada  
Matthew Kelley, NIH, United States  
Robert Kelly, Aix Marseille Universite UMR 7288 CNRS, France  
William Kelly, Emory University, United States  
Gavin Kelsey, Babraham Institute, United Kingdom  
Christine Kern, Medical University of South Carolina, United States  
Daniel Kerschensteiner, Washington University School of Medicine, United States  
Sharon Kessler, University of Oklahoma, United States  
Roger Keynes, University of Cambridge, United Kingdom  
Saadi Khochbin, INSERM, France  
Thomas Kidd, University of Nevada, United States  
Timothy Kieffer, University of British Columbia, Canada  
Dan Kiehart, Duke University, United States  
Seung K. Kim, Stanford University, United States  
David Kimelman, Univ of Washington Sch of Med, United States  
Alan Kimmel, NIH, United States  
Mary Lou King, Univ. of Miami, United States  
Andreas Kispert, Medizinische Hochschule Hannover, Germany  
Jan Kitajewski, Columbia University, United States  
Christian Klambt, Universitat Munster, Germany  
Rudiger Klein, MPI for Neurobiology, Germany  
William Klein, The University of Texas M. D. Anderson Cancer Center, United States  
Ophir Klein, The University of California, United States  
Jürgen Kleine-Vehn, Univ. of Natural Resources & Life Sciences Vienna, Austria  
Juergen Knoblich, IMBA, Austria  
Jason Knott, Michigan State University, United States  
Eli Knust, Max Planck Institute, Germany  
Tatsuya Kobayashi, Massachusetts General Hospital, United States  
Laurent Kodjabachian, IBDM, France  
Georgy Koentges, University of Warwick, United Kingdom  
Reinhard Koester, Technical University of Braunschweig, Germany  
Gou Young Koh, KAIST, Korea, Republic of  
Anthony Koleske, Yale University, United States  
Alex Kolodkin, HHMI, United States  
Katarzyna Koltowska, Institute for Molecular Bioscience, Australia  
Hisato Kondoh, Kyoto Sangyo University, Japan  
Gen Kondoh, Kyoto University, Japan  
Bon-Kyoung Koo, Wellcome Trust Centre, United Kingdom  
Raphael Kopan, Cincinnati Children's hospital, United States  
Janel Kopp, The University of British Columbia, Canada  
Thomas Kornberg, University of California, United States  
Hendrik Korswagen, Hubrecht Institute, Netherlands  
Noora Kotaja, University of Turku, Finland  
Darrell Kotton, Boston University, United States  
Valerie Kouskoff, Paterson Institute for Cancer Research, United Kingdom  
Elena Kramer, Harvard, United States  
Mark Krasnow, Stanford University School of Medicine, United States  
Jordan Kreidberg, Children's Hospital Boston, United States  
Paul Krieg, Univ. of Arizona College of Med., United States

Arnold Kriegstein, UCSF, United States  
Shihuan Kuang, Purdue University, United States  
Yoshiaki Kubota, Keio university, Japan  
Sarah Kucenas, University of Virginia, United States  
Justin Kumar, Indiana University, United States  
Tsutomu Kume, Northwestern University, United States  
Tilo Kunath, MRC Centre for Regenerative Medicine, United Kingdom  
Chay Kuo, Duke University, United States  
Shigeru Kuratani, Center for Developmental Biology, RIKEN, Japan  
Hiroki Kurihara, The University of Tokyo, Japan  
Kenro Kusumi, Arizona State University, United States  
Dorota Kwiatkowska, University of Silesia, Poland  
Chulan Kwon, Johns Hopkins University, United States  
Michel Labouesse, IGBMC, France  
Georges Lacaud, Paterson Institute for Cancer Research, United Kingdom  
Raj Ladher, RIKEN Center for Developmental Biology, Japan  
John Larkin, Louisiana State University, United States  
Paul Lasko, McGill University, Canada  
Andrew Lassar, Harvard Med. Sch., United States  
Allen Laughon, University of Wisconsin, United States  
Roland Leborgne, CNRS, France  
Virginie Lecaudey, University of Freiburg, Germany  
Soo-Kyung Lee, OHSU, United States  
Cheng-Yu Lee, University of Michigan Medical School, United States  
Martin Leeb, University of Cambridge, United Kingdom  
Veronique Lefebvre, Lerner Research Institute, United States  
Ruth Lehmann, NYU School of Medicine and HHMI, United States  
Christian Lehner, University of Zurich, Switzerland  
Harry Leitch, University of Cambridge, United Kingdom  
Frederic Lemaigre, Université catholique de Louvain, Belgium  
Bruno Lemaitre, EPFL, Switzerland  
Pierre Leopold, CNRS, France  
Giovanni Levi, CNRS/MNHN, France  
Michael Levine, University of California, United States  
Edward Levine, University of Utah, United States  
Gil Levkowitz, Weizmann Institute of Science, Israel  
Ottoline Leyser, University of Cambridge, United Kingdom  
James Li, University of Connecticut Health Center, United States  
Yi Li, Baylor College of Medicine, United States  
Qinglei Li, Texas A&M University, United States  
Meng Li, Cardiff Uni, United Kingdom  
Eric Liao, Massachusetts General Hospital, United States  
Diana Libuda, University of Oregon, United States  
Heiko Lickert, Helmholtz Zentrum Munchen, Germany  
Ivo Lieberam, King's College London, United Kingdom  
Graham Lieschke, Monash University, Australia  
Mary Lilly, CBMB/NICHD/NIH, United States  
Xinhua Lin, Cincinnati children's Hospital medical center, United States  
Shau-Ping Lin, National Taiwan University, Taiwan  
Ulf Lindahl, Uppsala University, Sweden  
Geoffrey Lindeman, The Walter and Eliza Hall Institute of Medical Research, Australia  
Brian Link, Medical College of Wisconsin, United States

Zach Lippman, Cold Spring harbor Laboratory, United States  
Howard Lipshitz, University of Toronto, Canada  
Charles Little, University of Kansas Medical Ctr, United States  
Melissa Little, Murdoch Children's Research Institute, Australia  
Kui Liu, University of Gothenburg, Sweden  
Karen Liu, King's College London, United Kingdom  
Pentao Liu, Wellcome Trust Sanger Institute, United Kingdom  
Rick Livesey, University of Cambridge, United Kingdom  
Malcolm Logan, King's College London, United Kingdom  
Jonathan Loh, Institute of Molecular and Cell biology, Singapore  
Jan Lohmann, University of Heidelberg, Germany  
Ingrid Lohmann, MPI for Developmental Biology, Germany  
Christian Lohmann, Netherlands Institute for Neuroscience, Netherlands  
Jeff Long, UCLA, United States  
Fanxin Long, Washington University School of Medicine, United States  
Guillermina Lopez-Bendito, Instituto de Neurociencias de Alicante, Spain  
Siobhan Loughna, University of Nottingham, United Kingdom  
Frank Lovicu, University of Sydney, Australia  
Christopher Lowe, Stanford University, United States  
Sally Lowell, University of Edinburgh, United Kingdom  
Erik Lundquist, University of Kansas, United States  
Christian Luschnig, University of Natural Resources and Applied Life Sciences, Austria  
Stefan Luschnig, University of Zurich, Switzerland  
Matthias Lutolf, EPF Lausanne, Switzerland  
Jeremy Lynch, University of Illinois at Chicago, United States  
David Lyons, University of Edinburgh, United Kingdom  
Deirdre Lyons, Duke, United States  
Qiufu Ma, Dana-Farber Cancer Institute, United States  
Liang Ma, Washington University, United States  
Jun Ma, Cincinnati Children's Hospital, United States  
Marcy MacDonald, Massachusetts General Hospital Simches, United States  
Khaled Machaca, Weill Cornell Medical College, United States  
Amy Maddox, UNC-Chapel Hill, United States  
Christa Maes, KU Leuven, Belgium  
Ari Mähönen, University of Helsinki, Finland  
Eleanor Maine, Syracuse University, United States  
Pascal Maire, Inst. Cochin, France  
Alexis Maizel, University of Heidelberg, Germany  
Mark Majesky, University of Washington, United States  
Taija Makinen, Uppsala University, Sweden  
Takako Makita, USC, United States  
Vivek Malhotra, CRG, Spain  
Moises Mallo, Inst. Gulbenkian de Ciencia, Portugal  
Nancy Manley, University of Georgia, United States  
Richard Mann, Columbia University, United States  
Fanny Mann, Institut de Biologie du Développement de Marseille, France  
Mattias Mannervik, Stockholm University, Sweden  
Ahmed Mansouri, Max-Planck Institute for Biophysical Chemistry, Germany  
Miguel Manzanares, CNIC, Spain  
Junhao Mao, University of Massachusetts Medical School, United States  
Christophe Marcelle, Monash University, Australia  
Ralph Marcucio, UCSF, United States

Oscar Marin, King's College, United Kingdom  
Silvia Marino, Barts and The London SMD, United Kingdom  
Michele Markstein, Univ. of Mas. Amhurst, United States  
Florence Marlow, Albert Einstein College of Medicine, United States  
Nick Marsh-Armstrong, Johns Hopkins University School of Medicine, United States  
Graziano Martello, University of Padua, United Kingdom  
Elisa Marti, Consejo Superior de Investigaciones Cientificas, Spain  
James Martin, Baylor College of Medicine, United States  
Paul Martin, University of Bristol, United Kingdom  
Adam Martin, MIT, United States  
Arnaud Martin, University of California Berkeley, United States  
Fernando Martin-Belmonte, Consejo Superior de Investigaciones Cientificas, Spain  
Maria Dolores Martin-Bermudo, Univ. Pablo de Olavide., Spain  
Enrique Martin-Blanco, Instituto de Biología Molecular de Barcelona, CSIC, Spain  
Mark Martindale, University of Florida, United States  
Alfonso Martinez Arias, University of Cambridge, United Kingdom  
Juan Pedro Martinez-Barbera, UCL-Institute of Child Health, United Kingdom  
Juan Ramon Martinez-Morales, CABD (CSIC/UPO), Spain  
Enrique Martinez-Perez, Imperial College, United States  
Ichiro Masai, Okinawa Institute of Science and Technology Graduate University, Japan  
John Mason, University of Edinburgh, United Kingdom  
Stefan Materna, UCSF, United States  
Fumio Matsuzaki, RIKEN Center for Developmental Biology, Japan  
Erika Matunis, Johns Hopkins University School of Medicine, United States  
Cedric Maurice, Institute of Developmental Biology of Marseille, France  
Madelon Maurice, UMC Utrecht, Netherlands  
Robert Maxson, USC Keck School of Medicine, United States  
Roberto Mayor, University College London, United Kingdom  
Prof. Satyajit Mayor, National Centre for Biological Sciences, India  
Audrey McAlinden, Washington University, United States  
Andrew McCaskie, Cambridge, United Kingdom  
David McCauley, University of Oklahoma, United States  
David McClay, Duke University, United States  
Pierre McCrea, Univ. Texas MDACC, United States  
Jocelyn McDonald, Kansas State University, United States  
Sarah McFarlane, University of Calgary, Canada  
Edwina McGlenn, Monash University, Australia  
Kim McKim, Rutgers University, United States  
Francis McNally, University of California, Davis, United States  
Helen McNeill, LTRI, Mt Sinai Hospital & Univ. of Toronto, Canada  
Daniel Medeiros, University of Colorado, Boulder, United States  
Kathryn Medler, University at Buffalo, United States  
Alexander Medvinsky, Inst. for Stem Cell Research, United Kingdom  
Sean Megason, Harvard Medical School, United States  
Lin Mei, Institute of Molecular Medicine and Genetics, MCG, United States  
Cathy Lee Mendelsohn, Columbia University, United States  
Nadia Mercader, Centro Nacional de Investigaciones Cardiovasculares, Spain  
Amy Merrill, University of Southern California, United States  
Bradley Merrill, University of Illinois at Chicago, United States  
Barbara Meyer, HHMI / U.C. Berkeley, United States  
Dirk Meyer, Leopold-Franzens-University, Austria  
Martin Meyer, King's College London, United Kingdom



Long Miao, Institute of Biophysics, Chinese Academy of Sciences, China  
Scott Michaels, Indiana University, United States  
Takashi Mikawa, University California San Francisco, United States  
Marja L. Mikkola, University of Helsinki, Finland  
Marco Milan, Institut de Recerca Biomedica (IRB), Spain  
Tom Millard, University of Manchester, United Kingdom  
Kathleen Millen, Seattle Children's Hospital Research Institute, United States  
Craig Miller, UC-Berkeley, United States  
Naojiro Minami, Kyoto University, Japan  
Jonathan Minden, Carnegie Mellon University, United States  
Helena Mira, Instituto de Salud Carlos III, Spain  
Rhona Mirsky, UCL, United Kingdom  
Thomas Misgeld, Technical University of Munich, Germany  
Yuji Mishina, University of Michigan, United States  
Charlotte Mistretta, University of Michigan, United States  
Brian Mitchell, Northwestern University Feinberg School of Medicine, United States  
Taro Mito, The University of Tokushima, Japan  
Masayuki Miura, Grad. Sch. Pharm. Sci., Univ. Tokyo, Japan  
Goichi Miyoshi, NYU, United States  
Naoki Mochizuki, National Cerebral and Cardiovascular Center Research Institute, Japan  
Cecilia Moens, Fred Hutchinson Cancer Research Center, United States  
Timothy Mohun, The Francis Crick Institute, United Kingdom  
Zoltan Molnar, University of Oxford, United Kingdom  
Anne Monsoro-Burq, Institut Curie, INSERM U1021, CNRS, UMR 3347, France  
Denise Montell, University of California, United States  
Sally Moody, George Washington University, United States  
Anne Moon, Weis Center for Research, University of Utah, United States  
Kathryn Moore, University of Utah, United States  
Eurico Morais-de-Sá, IBMC, Portugal  
Eduardo Moreno, University of Bern, Switzerland  
Bruce Morgan, Harvard Medical School, United States  
Ed Morrissey, University of Pennsylvania, United States  
Ivan Moskowitz, The University of Chicago, United States  
Arne Mould, U Oxford, United Kingdom  
Bernard Moussian, Interfaculty Institute for Cell Biology, Germany  
Ulrich Mueller, The Scripps Research Institute, United States  
Jonas Muhr, Ludwig Institute for Cancer Research, Sweden  
Hans-Arno Muller, University of Dundee, United Kingdom  
Mary C. Mullins, University of Pennsylvania, United States  
Ken Muneoka, Tulane University, United States  
Pura Munoz-Canoves, iCREA, Spain  
Andrea Munsterberg, University of East Anglia, United Kingdom  
Ryutaro Murakami, Yamaguchi University, Japan  
John Murray, U. Pennsylvania, United States  
Jeremy Murray, John Innes Centre, United Kingdom  
Lewis Murtaugh, University of Utah, United States  
Takashi Nagasawa, Inst. for Frontier Medical Sciences, Kyoto University, Japan  
Masato Nakafuku, Cincinnati Children's Hospital Research Foundation, United States  
Shinichi Nakagawa, RIKEN, Japan  
Satoshi Namekawa, Cincinnati Children's Hospital, United States  
June Nasrallah, Cornell University, United States  
Utpal Nath, Indian Inst of Science Bangalore, India

Serge Nef, University of Geneva Medical School, Switzerland  
David Nelson, University of Georgia, United States  
Andrew Nelson, University of Oxford, United Kingdom  
Stuart A. Newman, New York Medical College, United States  
Phillip Newmark, HHMI/ University of Illinois at Urbana-Champaign, United States  
Carl Ng, University College Dublin, Ireland  
Huck Hui Ng, Genome Institute of Singapore, Singapore  
Laurent Nguyen, Université de Liege, Belgium  
Kim Nguyen-Ba-Charvet, Institut de la Vision, France  
Jennifer Nichols, University of Cambridge, United Kingdom  
Stefania Nicoli, Yale School of Medicine, United States  
Christof Niehrs, IMB Institute of Molecular Biology gGmbH, Germany  
Philipp Niethammer, Memorial Sloan Kettering Cancer Center, United Kingdom  
Angela Nieto, Instituto de Neurociencias de Alicante, Spain  
Zachary Nimchuk, Virginia Tech, United States  
Jovica Ninkovic, Helmholtz Center Munich, Germany  
Hiroki Nishida, Osaka University, Japan  
Ryuichi Nishinakamura, Kumamoto University, Japan  
Akiko Nishiyama, University of Connecticut, United States  
Lee Niswander, Howard Hughes Medical Institute, United States  
Hitoshi Niwa, RIKEN, Japan  
Angelika A. Noegel, Universitat zu Kolen, Germany  
Dominic Norris, MRC Mammalian Genetics Unit, United Kingdom  
Trista North, Beth Israel Deaconess Medical Center, United States  
Maria Cristina Nostro, UHN, Canada  
Bennett Novitch, UCLA School of Medicine, United States  
Masami Nozaki, Osaka University, Japan  
Ryan Null, UC Berkeley, United States  
Roeland Nusse, Stanford University, United States  
Todd Nystul, UCSF, United States  
Andrew Oates, MRC National Institute for Medical Research, United Kingdom  
Jon Oatley, Washington State University, United States  
Elke Ober, University of Copenhagen, Denmark  
Lucy O'Brien, Stanford University School of Medicine, United States  
Michael O'Connor, University of Minnesota, United States  
Michael O'Connor, University of Western Sydney, Australia  
Kate O'Connor-Giles, University of Wisconsin-Madison, United States  
Takehiko Ogawa, Yokohama City University, Japan  
Stacey Ogden, St. Jude Children's Research Hospital, United States  
Atsuo Ogura, RIKEN Bioresource Center, Japan  
Kazuyuki Ohbo, Yokohama City University, School of Medicine, Japan  
Benjamin Ohlstein, Columbia University Medical School, United States  
Shin-ichi Ohnuma, UCL Institute of Ophthalmology, United Kingdom  
Hayato Ohshima, Niigata University Graduate School of Medical and Dental Sciences, Japan  
Yuki Okada, The University of Tokyo, Japan  
Hidiyuki Okano, Keio university school of medicine, Japan  
Peter Okkema, Univ. of Illinois at Chicago, United States  
Paola Oliveri, Univ. College London, United Kingdom  
Shoichiro Ono, Emory University, United States  
Ryuichi Ono, National Institute of Health Sciences, Japan  
Naomi Ori, Hebrew University of Jerusalem, Israel  
David Ornitz, Washington Univ. Sch. of Med., United States

Anthony Oro, Stanford University, United States  
Terry Orr-Weaver, Whitehead Institute, United States  
Lars Ostergaard, John Innes Centre, United Kingdom  
Guangshuo Ou, Institute of Biophysics, China  
Nestor Oviedo, University of California, Merced, United States  
Leif Oxburgh, Maine Medical Center Research Institute, United States  
Maurizio Pacifici, The Children's Hospital of Philadelphia, United States  
Michael Pack, University of Pennsylvania, United States  
David Page, Whitehead Institute, United States  
Isabel Palacios, University of Cambridge, United Kingdom  
James Palis, University of Rochester Medical Center, United States  
Francesca Palladino, Ecole Normale Supérieure de Lyon, France  
Duoja Pan, Johns Hopkins University School of Medicine, United States  
Petra Pandur, University of Ulm, Germany  
Lia Panman, University of Leicester, United Kingdom  
Periklis Pantazis, ETH Zurich, Switzerland  
Michael Parsons, Johns Hopkins University, United States  
Juha Partanen, University of Helsinki, Finland  
Amy Pasquinelli, UCSD, United States  
Roger Patient, Oxford University, United Kingdom  
Elspeth Payne, University College London, United Kingdom  
Francois Payre, CNRS & University of Toulouse, France  
Bret Pearson, Hospital for Sick Children, Canada  
Mark Peifer, University of North Carolina, United States  
Francisco Pelegri, University of Wisconsin-Madison, United States  
Melissa Pepling, Syracuse University, United States  
Martin Pera, UNIVERSITY OF MELBOURNE, Australia  
Francesca Peri, EMBL Heidelberg, Germany  
Thomas Perlmann, Ludwig Institute for Cancer Res., Sweden  
Anselme Perrier, Inserm/UEVE UMR861, I-Stem, AFM, France  
Norbert Perrimon, Harvard Medical School, United States  
Muriel Perron, Université Paris Sud, France  
Matija Peterlin, UCSF, United States  
Antoine Peters, Friedrich Miescher Institute for Biomedical Research, Switzerland  
Christian Petersen, Northwestern, United States  
Carsten Peterson, Lund University, Sweden  
Claudia Petritsch, UCSF, United States  
Karl Pfeifer, National Institutes of Health, United States  
Patricia Phelps, UCLA, United States  
Stefano Piccolo, University of Padua School of Medicine, Italy  
Franck Pichaud, MRC, LMCB, United Kingdom  
Leslie Pick, University of Maryland, United States  
Jan Pielage, Friedrich Miescher Institute, Switzerland  
Alessandra Pierani, Institut Jacques Monod CNRS Université Paris Diderot, France  
Francesca Pignoni, SUNY Upstate Medical University, United States  
Tatjana Piotrowski, Stowers Institute for Medical Research, United States  
Marysia Placzek, University of Sheffield, United Kingdom  
Samuel Pleasure, UCSF, United States  
David Pleasure, UC Davis School of Medicine, United States  
Franck Polleux, Columbia University, United States  
Marco Pontoglio, Cochin Institute / INSERM U1016/ CNRS UMR8104/ UP5, France  
Richard Poole, University College London, United Kingdom

Enzo Porrello, The University of Queensland, Australia  
Kenneth Poss, Duke University Medical Center, United States  
Tamara Potapova, Stowers Institute for Medical Research, United States  
Steve Potter, Children's Hospital Medical Center, United States  
Olivier Pourquie, Harvard Medical School, France  
Tom Pratt, University of Edinburgh, United Kingdom  
Thomas Preat, ESPCI, France  
Ken Prehoda, University of Oregon, United States  
David J. Price, The University of Edinburgh, United Kingdom  
Stephen Price, University College London, United Kingdom  
Mary Price, Okinawa Inst. Science Technology, Japan  
Andreas Prokop, The University of Manchester, United Kingdom  
Nicholas Provart, University of Toronto, Canada  
Marcel Proveniers, Utrecht University, Netherlands  
William Pu, Childrens Hospital Boston, United States  
Jianwen Que, University of Rochester, United States  
Jordan Raff, University of Oxford, United Kingdom  
David Raible, University of Washington, United States  
Arjun Raj, Penn, United States  
Jayaraj Rajagopal, Harvard University, United States  
Aleksandar Rajkovic, University of Pittsburgh, United States  
Amy Ralston, Michigan State University, United States  
Mirana Ramialison, Australian Regenerative Medicine Institute, Australia  
Ramiro Ramirez-Solis, Sanger Institute, United Kingdom  
Emma Rawlins, University of Cambridge, United Kingdom  
Pamela Raymond, University of Michigan, United States  
Erez Raz, Institute for Cell Biology, Germany  
Ilaria Rebay, University of Chicago, United States  
Michael Redd, University of Utah, United States  
Peter Reddien, MIT, Whitehead Institute, HHMI, United States  
Randall Reed, HHMI, United States  
Bob Reed, Cornell University, United States  
Bruce Reed, University of Waterloo, Canada  
Thomas Reh, University of Washington, United States  
Valerie Reinke, Yale University School of Medicine, United States  
Michael Rendl, Mount Sinai School of Medicine, United States  
Rainer Renkawitz, Justus-Liebig-University Giessen, Germany  
Renate Renkawitz-Pohl, Philipps University of Marburg, Germany  
Stephen Renshaw, The University of Sheffield, United Kingdom  
Fabian Rentzsch, Sars International Centre, Norway  
Vanessa Ribes, UMRS-787, France  
Linda Richards, University of Queensland, Australia  
Lynn Riddiford, Howard Hughes Medical Institute, United States  
Jason Rihel, UCL, United Kingdom  
Filippo Rijli, Friedrich Miescher Institute (FMI), Switzerland  
Bruce Riley, Texas A&M University, United States  
Paul Riley, University of Oxford, United Kingdom  
Jochen Rink, MPI-CBG, Germany  
Pamela Robey, NIH, United States  
Avi Rodal, Brandeis University, United States  
Matthew Rodeheffer, Yale University, United States  
Adrienne Roeder, California Institute of Technology, United States

Henry Roehl, University of Sheffield, United Kingdom  
Katja Roper, MRC-Laboratory of Molecular Biology, United Kingdom  
Nicolas Rohner, Harvard Medical School, United States  
Melissa Rolls, The Pennsylvania State University, United States  
Beth Roman, University of Pittsburgh, United States  
Matthew Ronshaugan, University of Manchester, United Kingdom  
Dennis Roop, University of Colorado Denver, United States  
Marian Ros, Instituto de Biomedicina y Biotecnología de Cantabria, Spain  
Janet Rossant, The Hospital for Sick Children, Canada  
Siegfried Roth, University of Cologne, Germany  
Eric Rottinger, CNRS/INSERM/University of Nice-Sophia-Antipolis, France  
Ann Rougvie, University of Minnesota, United States  
David Rowitch, UCSF Children's Hospital, United States  
Sudipto Roy, Institute of Molecular and Cell Biology, Singapore  
Stephen Royle, University of Warwick, United Kingdom  
John Rubenstein, UCSF, United States  
Ida Ruberti, National Research Council, Italy  
Nancy Ruddle, Yale University School of Public Health, United States  
Christiana Ruhrberg, UCL Institute of Ophthalmology, United Kingdom  
Mar Ruiz-Gomez, Universidad Autonoma, Spain  
Mark Running, University of Louisville, United States  
Tor Erik Rusten, Institute for Cancer Research, Norway  
Soojin Ryu, Max Planck Institute for Medical Research, Germany  
Alessandra Sacco, Sanford Burnham, United States  
Alvaro Sagasti, UCLA, United States  
Armen Saghatelian, Université Laval, Canada  
Mitinori Saitou, Graduate School of Medicine, Kyoto University, Japan  
Hitoshi Sakano, University of Fukui, School of Medicine, Japan  
Iris Salecker, The Francis Crick Institute, United Kingdom  
Patricia Salinas, University College London, United Kingdom  
Emilio Salo, Universitat de Barcelona, Spain  
David Salomon, NCI, United States  
Paolo Salomoni, UCL cancer institute, United Kingdom  
Christos Samakovlis, The Wenner-Gren Institute, Sweden  
Maurilio Sampaoli, KU Leuven, Belgium  
Arun Sampathkumar, California Institute of Technology, United States  
Helen Sang, University of Edinburgh, United Kingdom  
Owen Sansom, Beatson Inst for Cancer Res., United Kingdom  
Benedicte Sanson, University of Cambridge, United Kingdom  
Juan Jose Sanz-Ezquerro, Centro Nacional de Biotecnología, CSIC, Spain  
Vittorio Sartorelli, NIAMS, United States  
Hiroshi Sasaki, Osaka University, Japan  
Akira Satoh, Okayama University, Japan  
Frederic SAUDOU, Univ Grenoble Alpes -Inserm, France  
Jean-Sebastien Saulnier-Blache, INSERM U1048, France  
Norman Saunders, The University of Melbourne, Australia  
Timothy Saunders, National University of Singapore, Singapore  
Hitoshi Sawa, National Institute of Genetics, Japan  
Kazunobu Sawamoto, Nagoya City University, Japan  
Enrico Scarpella, University of Alberta, Canada  
Raphael Scharfmann, INSERM U1016, France  
Paul Schedl, Princeton University, United States

Ben Scheres, Wageningen University Research, Netherlands  
Alexander Schier, Harvard University, United States  
Thomas Schilling, University of California, Irvine, United States  
Alejandro Schinder, Instituto Leloir, Argentina  
Ernestina Schipani, University of Michigan, United States  
Urs Schmidt-Ott, University of Chicago, United States  
Lynn Schnapp, Medical Univ. of South Carolina, United States  
Kay Schneitz, TU Munich, Germany  
Frank Schnorrer, MPI of Biochemistry, Germany  
Hans Schöler, Max Planck Institute for Molecular Biomedicine, Germany  
Steffen Scholpp, Karlsruhe Institute of Technology (KIT), Germany  
Reinhard Schuh, MPI, Germany  
Ulrich Schüller, Ludwig-Maximilians University, Germany  
Dorothea Schulte, Goethe University Medical School, Germany  
Stefan Schulte-Merker, WWU Münster, Germany  
Thomas Schultheiss, Technion-Israel Institute of Technology, Israel  
Elizabeth Schultz, University of Lethbridge, Canada  
Karin Schumacher, University of Heidelberg, Germany  
Trudi Schupbach, HHMI/Princeton University, United States  
Eugene Schuster, University College London, United Kingdom  
Carol Schuurmans, University of Calgary, Canada  
Martin Schwartz, Yale University, United States  
Francois Schweisguth, Institut Pasteur, France  
Ronen Schweitzer, Shriners Hospital for Children, Portland, United States  
Ian Scott, The Hospital for Sick Children, Canada  
Matthew Seaman, Cambridge Institute for Medical Research, United Kingdom  
Rosalind Segal, Harvard Medical School, United States  
Ryohei Sekido, University of Aberdeen, United Kingdom  
Dalit Sela-Donenfeld, Hebrew University, Israel  
Henrik Semb, Lund University, Sweden  
Giovanni Sena, Imperial College, United Kingdom  
Florenci Serras, Universitat de Barcelona, Spain  
Palle Serup, Copenhagen University, Denmark  
A. Mark Settles, University of Florida, United States  
Geraldine Seydoux, Johns Hopkins U. School of Medicine, United States  
Shai Shaham, The Rockefeller University, United States  
Jafar Sharif, RIKEN-IMS, Japan  
Paul Sharpe, Kings College London, United Kingdom  
James Sharpe, Centre for Genomic Regulation (CRG), Spain  
Kang Shen, Stanford University, United States  
Zu-Hang Sheng, NIH, United States  
Yun-Bo Shi, NICHD/NIH, United States  
Songhai Shi, Sloan-Kettering Institute, United States  
Ben-Zion Shilo, Weizmann Institute, Israel  
Donghun Shin, University of Pittsburgh, United States  
Takashi Shinohara, Kyoto University, Japan  
Stanislav Shvartsman, Princeton University, United States  
Ng Shyh-Chang, Genome Institute of Singapore, Singapore  
Dirk Sieger, University of Edinburgh, United Kingdom  
Arndt Siekmann, Max Planck Institute for Molecular Biomedicine, Germany  
Roy Sillitoe, Baylor College of Medicine, United States  
Jose Silva, The Wellcome Trust Centre for Stem Cell Research, United Kingdom

Antonio Simeone, Institute of Genetics and Biophysics, Italy  
Ruediger Simon, Heinrich-Heine University, Germany  
Sunder Sims-Lucas, University of Pittsburgh, United States  
Robert Singer, Albert Einstein College of Medicine, United States  
Amit Singh, University of Dayton, United States  
Shree Ram Singh, National Cancer Institute, United States  
Sanjay Sinha, University of Cambridge, United Kingdom  
Mikiko Siomi, University of Tokyo, Japan  
Hazel Sive, Whitehead Institute/ MIT, United States  
James Skeath, Washington University School of Medicine, United States  
Mihaela Skobe, Mount Sinai School of Medicine, United States  
Frank Slack, Institute for RNA Medicine, United States  
Keith Slotkin, Ohio State University, United States  
Stephen Small, New York University, United States  
Craig Smibert, University of Toronto, Canada  
Marten Smidt, University of Amsterdam, Netherlands  
Lee Smith, University of Edinburgh, United Kingdom  
Joel Smith, Woods Hole Marine Biological Laboratory, United States  
Hans-Willem Snoeck, Columbia University Medical Center, United States  
Michael Soares, Institute of Maternal-Fetal Biology, United States  
Anna Marie Sokac, Baylor College of Medicine, United States  
Sergei Sokol, Mount Sinai Medical School, United States  
David Solecki, St. Jude Children's Research Hospital, United States  
Lilianna Solnica-Krezel, Washington University School of Medicine, United States  
Davor Solter, Max-Planck Institute, Germany  
Lukas Sommer, University of Zurich, Switzerland  
Beatriz Sosa-Pineda, St. Jude Children's Research Hospital, United States  
Martha Soto, Rutgers -Robert Wood Johnson Medical School, United States  
Jane Sowden, UCL Institute of Child Health, United Kingdom  
Francesca Spagnoli, Max Delbrueck Center for Molecular Medicine, Germany  
Nathalie Spassky, inserm, France  
Nancy Speck, UPenn School of Medicine, United States  
Jason Spence, University of Michigan, United States  
Allan Spradling, HHMI/Carnegie Inst, United States  
Simon Sprecher, Universite de Fribourg, Switzerland  
Shankar Srinivas, University of Oxford, United Kingdom  
Daniel St Johnston, Wellcome Trust/Cancer Research UK Gurdon Institute, United Kingdom  
Didier Stainier, Max Planck Institute, Germany  
Kryn Stankunas, University of Oregon, United States  
Pamela Stanley, Albert Einstein, United States  
Edouard Stanley, Murdoch Childrens Research Institute, Australia  
Daniel Starr, Univ. Calif. Davis, United States  
Angelike Stathopoulos, Caltech - Pasadena, United States  
Marios Stavridis, University of Dundee, United Kingdom  
David Stein, Univ of Texas, United States  
Paula Stein, University of Pennsylvania, United States  
Torsten Stein, University of Glasgow, United Kingdom  
Derek Stemple, Wellcome Trust Sanger Inst., United Kingdom  
Mary Stepp, The George Washington University, United States  
Claudio Stern, University College London, United Kingdom  
Ruth Steward, Rutgers University, United States  
Francis Stewart, Dresden University of Technology, Germany

Allison Stewart, University of Texas M.D. Anderson Cancer Center, United States  
Heather Stickney, UCL, United Kingdom  
John Stingl, CRUK Cambridge Research Institute, United Kingdom  
David Stock, University of Colorado, United States  
Esther Stoeckli, University of Zurich, Switzerland  
Kate Storey, University of Dundee, United Kingdom  
Andrea Streit, King's College London, United Kingdom  
Gary Struhl, Columbia University, United States  
David Strutt, University of Sheffield, United Kingdom  
Lorenz Studer, Memorial Sloan Kettering Cancer Center, United States  
Michele Studer, Institute of Biology Valrose, iBV, France  
Chris Sturgeon, Washington University, United States  
Yi-Hsien Su, Academia Sinica, Taiwan  
Henry Sucoy, University of Southern California, United States  
William Sullivan, University of California, United States  
Henry Sun, Academia Sinica, Taiwan  
Xin Sun, University of Wisconsin-Madison, United States  
Tai-ping Sun, Duke University, United States  
Meera Sundaram, University of Pennsylvania, United States  
Sibum Sung, University of Texas, United States  
Hoon-Ki Sung, Hospital for Sick Children Research Institute (SickKids), Canada  
Azim Surani, Wellcome Trust/Cancer Research UK Gurdon Institute, United Kingdom  
Lori Sussel, Columbia University, United States  
Magali Suzanne, Toulouse, France  
Hitomi Suzuki, Tokyo Medical and Dental University, Japan  
Takashi Suzuki, Tokyo Institute of Technology, Japan  
Anand Swaroop, National Eye Institute, United States  
Sean Sweeney, University of York, United Kingdom  
Dylan Sweetman, University of Nottingham, United Kingdom  
Francis Szele, University of Oxford, United Kingdom  
Daniel B Szymanski, Purdue University, United States  
Larry Taber, Washington University, United States  
Cliff Tabin, Harvard Medical School, United States  
Masazumi Tada, University College London, United Kingdom  
Paul Taghert, Washington Univ School Medicine, United States  
Shahragim Tajbakhsh, Institut Pasteur, France  
Kazutoshi Takahashi, CiRA, Japan  
Shu Takeda, KEIO University, Japan  
Teruko Taketo, McGill University, Canada  
Masaharu Takigawa, Okayama University Dental School, Japan  
William Talbot, Stanford University, United States  
Patrick Tam, Childrens Medical Research Institute, Australia  
John Tamkun, University of California, Santa Cruz, United States  
Elly Tanaka, Technische Universität Dresden, CRTD, Germany  
Hiromitsu Tanaka, Osaka University, Japan  
Mikiko Tanaka, Tokyo Institute of Technology, Japan  
Satoshi Tanaka, The University of Tokyo, Japan  
Guy Tanentzapf, The University of British Columbia, Canada  
Nicolas Tapon, Cancer Research UK London Research Institute, United Kingdom  
Victor Tarabykin, Inst for Cell Biology & Neurobiology, at the Charite, Germany  
Masao Tasaka, Nara Institute of Science and Technology, Japan  
Tomoko Tateya, Kyoto University, Japan



Verdon Taylor, University of Basel, Switzerland  
Sally Temple, Neural Stem Cell Institute, United States  
Jason Tennesen, University of Indiana, United States  
Thomas Theil, University of Edinburgh, United Kingdom  
Irma Thesleff, Univ of Helsinki, Finland  
Thorold Theunissen, Whitehead Institute for Biomedical Research, United States  
Jean Paul Thiery, IMCB, Singapore  
Barry Thompson, London Research Institute, United Kingdom  
Gerry Thomsen, Stony Brook University, United States  
Stefan Thor, Linköping University, Sweden  
Cheryll Tickle, University of Bath, United Kingdom  
Fadel Tissir, Universite Catholique de Louvain, Belgium  
Rune Toftgard, Karolinska Institutet, Sweden  
Andrew Tomlinson, Columbia University, United States  
Keiko Torii, University of Washington, United States  
Miguel Torres, CNIC, Spain  
Maria Elena Torres-Padilla, IGBMC, France  
Jesus Torres-Vazquez, NYU, United States  
Jan Traas, ENS-Lyon, France  
Philip Trackman, Boston University, United States  
Paul Trainor, Stowers Institute for Medical Research, United States  
David Traver, University of California, San Diego, United States  
Jessica Treisman, Skirball Institute, United States  
Didier Trono, EPFL, Switzerland  
Miltos Tsiantis, Max Planck Institute for Plant Breeding Research, Germany  
Noriyuki Tsumaki, Kyoto University, Japan  
Chandra Tucker, University of Colorado School of Medicine, United States  
Alda Tufro, Yale University, United States  
James Turner, MRC NIMR, United Kingdom  
David Twell, University of Leicester, United Kingdom  
Przemko Tylzanowski, University of Leuven, Belgium  
Tadashi Uemura, Kyoto University, Japan  
Jouni Uitto, Jefferson Medical College, United States  
Tully Underhill, The University of British Columbia, Canada  
Jay Unruh, Stowers Institute for Medical Research, United States  
Ludovic Vallier, Cambridge University, United Kingdom  
Sander van den Heuvel, Utrecht University, Netherlands  
Maurice van den Hoff, University of Amsterdam, Netherlands  
Christiaan van der Schoot, Norwegian University of Life Sciences, Norway  
Mark Van Doren, Johns Hopkins University, United States  
Fredericus Van Eeden, University of Sheffield, United Kingdom  
Don van Meyel, McGill UHC, Canada  
Filip Vandebussche, Ghent University, Belgium  
Susannah Varmuza, University of Toronto, Canada  
Nadine Vastenhouw, Max Planck Institute of Molecular Cell Biology and Genetics, Germany  
Kristen Verhey, University of Michigan Medical School, United States  
Esther Verheyen, Simon Fraser University, Canada  
Marie-Helene Verlhac, CIRB, College de France, France  
Julien Vermot, IGBMC, France  
Chad Vezina, University of Wisconsin-Madison, United States  
Christoph Viebahn, University of Goettingen, Germany  
Goncalo Vilhais-neto, IGBMC, France

Jean-Paul Vincent, National Institute Medical Research, United Kingdom  
Stephane Vincent, IGBMC, France  
Alain Vincent, CNRS/Université Paul Sabatier, France  
Peter Vize, University of Calgary, Canada  
Astrid Vogel-Höpker, TU Darmstadt, Germany  
Talila Volk, Weizmann Institute, Israel  
Albrecht von Arnim, University of Tennessee, United States  
Klaus von der Mark, University of Erlangen-Nuremberg, Germany  
Ekaterina Voronina, University of Montana, United States  
Andrea Vortkamp, Abteilung fuer Entwicklungsbiologie, Germany  
Marianne Voz, LBMGG, Belgium  
Hironori Wada, National Institute of Genetics, Japan  
William Wadsworth, Rutgers Robert Wood Johnson Medical School, United States  
Daniel Wagner, Rice University, United States  
Valerie Wallace, Toronto Western Research Institute, Canada  
John Wallingford, University of Texas, United States  
Lucas Waltzer, Centre de Biologie du Développement, France  
Da-Zhi Wang, Boston Children's Hospital, United States  
Rong Wang, University of California San Francisco, United States  
Jianlong Wang, Mount Sinai School of Medicine, United States  
Zhong Wang, Medical School, U Michigan, United States  
Fiona Wardle, King's College London, United Kingdom  
Andrew Waskiewicz, University of Alberta, Canada  
Paul Wassarman, Mount Sinai School of Medicine, United States  
Geoffrey Wasteneys, University of British Columbia, Canada  
Matthew Wawersik, College of William & Mary, United States  
Janis Weeks, University of Oregon, United States  
Gilbert Weidinger, Ulm University, Germany  
Cornelis Weijer, University of Dundee, United Kingdom  
Dolf Weijers, Wageningen University, Netherlands  
David Weisblat, University of California, Berkeley, United States  
Deneen Wellik, University of Michigan Medical Center, United States  
James Wells, Cincinnati Children's Hospital Research Foundation, United States  
Marius Wernig, Stanford University, United States  
Gary Wessel, Brown University, United States  
Oliver Wessely, Cleveland Clinic/Lerner Research Institute, United States  
Patrick Western, MIMR-PHI Institute of Medical Research, Australia  
Grant Wheeler, University of East Anglia, United Kingdom  
Rob White, Univ of Cambridge, United Kingdom  
Patricia White, University of Rochester, United States  
Jessica Whited, Harvard Medical School and Brigham & Women's Hospital, United States  
Tanya Whitfield, University of Sheffield, United Kingdom  
Kathleen Whitlock, Universidad de Valparaíso, Chile  
Hynek Wichterle, Columbia University Medical Center, United States  
Carol Wicking, The University of Queensland, Australia  
Eric Wieschaus, Princeton University, United States  
Athula Wikramanayake, The University of Miami, United States  
Dagmar Wilhelm, Monash University, Australia  
David Wilkinson, Francis Crick Institute, United Kingdom  
Karl Willert, UCSD, United States  
Carmen Williams, NIH/NIEHS, United States  
Bart Williams, Van Andel Research Institute, United States

Valerie Wilson, University of Edinburgh, United Kingdom  
Joerg Wilting, University of Goettingen, Germany  
Ernst Wimmer, Georg-August-University Goettingen, Germany  
Christoph Winkler, National University of Singapore, Singapore  
Andrea Wizenmann, University of Tuebingen, Germany  
Andreas Wodarz, University of Cologne, Germany  
Matthew Wolf, Duke University, United States  
Teresa Woodruff, Northwestern University, United States  
Christopher Wright, Vanderbilt University, United States  
Doris Wu, National Institute on Deafness, United States  
Sean Wu, Stanford School of Medicine, United States  
Wolfgang Wurst, Helmholtz Centre Munich, Germany  
Anton Wutz, Institute of Molecular Health Sciences, Switzerland  
Jennifer Wygoda, Duke, United States  
Joshua Wythe, Baylor College of Medicine, United States  
Ting Xie, Stowers Institute, United States  
Yue Xiong, Univ. North Carolina at Chapel Hill, United States  
Jian Xu, National University of Singapore, Singapore  
Shunsuke Yaguchi, University of Tsukuba, Japan  
Nir Yakoby, Rutgers University, United States  
Kenneth Yamada, NIH, United States  
Gen Yamada, Wakayama Medical University, Japan  
Yoshiyuki Yamamoto, University College London, United Kingdom  
Yojiro Yamanaka, McGill University, Goodman Cancer Center, Canada  
Naoki Yamanaka, UC Riverside, United States  
Yukiko Yamashita, University of Michigan, Ann Arbor, United States  
Wei Yan, University of Nevada, Reno, United States  
XianJie Yang, Jules Stein Eye Institute, United States  
Humphrey Hung-Chang Yao, NIEHS, United States  
Bing Ye, University of Michigan, United States  
Deborah Yelon, University of California, San Diego, United States  
Kexi Yi, Stowers Institute for Medical Research, United States  
Viravuth Yin, Davis Center for Regenerative Biology & Medicine, United States  
Qi-Long Ying, University of Southern California, United States  
Mervin Yoder, Indiana Univ. School of Medicine, United States  
Shosei Yoshida, National Institute for Basic Biology, Japan  
Rodrigo Young, UCL, United Kingdom  
Jr-Kai Yu, Inst of Cellular & Organismic Biol., Taiwan  
Katherine Yutzey, Children's Medical Center Cincinnati, United States  
Donald Zack, Johns Hopkins University School of Medicine, United States  
Jozsef Zakany, Universite de Geneve, Switzerland  
Jennifer Zallen, Sloan-Kettering Institute, United States  
Peter Zammit, King's College, United Kingdom  
Ken Zaret, University of Pennsylvania School of Medicine, United States  
Ricardo Zayas, San Diego State University, United States  
Julia Zeitlinger, Stowers Institute for Medical Research, United States  
Rolf Zeller, University of Basel, Switzerland  
Robert Zeller, San Diego State University, United States  
Elazar Zelzer, Weizmann Institute of Science, Israel  
Yi Zeng, Shanghai Institute of Biochemistry and Cell Biology, Chinese Academy of Sciences, China  
Magdalena Zernicka-Goetz, Gurdon Institute, University of Cambridge, United Kingdom  
Su-Chun Zhang, University of Wisconsin, United States

Hong Zhang, National Institute of Biological Sciences, Beijing, China  
Zunyi Zhang, Hangzhou Normal University, China  
Mei Zhen, Mount Sinai Hospital, Canada  
Bin Zhou, Vanderbilt University, United States  
Qiao Zhou, Harvard University, United States  
Irene Zohn, Children's National Medical Center, United States  
Leonard Zon, HHMI/Children's Hospital Boston, United States  
Aaron Zorn, Cincinnati Children's Hospital Med. Center, United States  
Yimin Zou, UCSD, United States  
Ann Zovein, UCSF, United States  
Jian Zuo, St. Jude Children's Research Hospital, United States  
An Zwijsen, VIB, K.U.Leuven, Belgium
